# Supplementary material for: The Role of Social Support in Perinatal Mental Health and Psychosocial Stimulation
Source: PubMed Central journal article supplement — Yale J Biol Med. 2024 Mar 29;97(1):3–16. doi: 10.59249/WMGE9032 (PMC10964812; doi:10.59249/wmge9032), 2024-03-29
Supplement: yjbm_97_1_3_appendix.pdf [file yjbm_97_1_3_appendix.pdf]

## Appendix A

**Table S1a**

*Predicting EPDS at 6-months post-randomization*

| Predictor           | Mean                                                                         | SD   | VIF  | <i>b</i> | <i>b</i><br>95% CI | <i>p</i> value | <i>r</i> |
|---------------------|------------------------------------------------------------------------------|------|------|----------|--------------------|----------------|----------|
| MSPSS<br>(baseline) | 5.37                                                                         | 1.18 | 1.04 | -0.97*** | [-1.40, -<br>0.54] | p<.0001        | -.29**   |
| EPDS<br>(baseline)  | 15.73                                                                        | 3.84 | 1.04 | 0.24***  | [6.22,<br>14.31]   | 0.0003         | .25**    |
| Treatment<br>dosage | 7.00                                                                         | 2.14 | 1.00 | -0.00    | [-0.24,<br>0.23]   | 0.97           | -.00     |
| Perinatal<br>Period | N/A (items<br>were coded<br>1 or 2<br>based on<br>pregnant or<br>postpartum) | N/A  | 1.00 | -0.27    | [-1.27,<br>0.72]   | 0.59           | -.04     |

**R<sup>2</sup> = .122 \*\***  
**95% CI [.05, .18]**

**Table S1b***Predicting PCL-6 at 6-months post-randomization*

| <b>Predictor</b>    | <b>Mean</b>                                                                  | <b>SD</b> | <b>VIF</b> | <b>b</b> | <b>b<br/>95% CI</b> | <b>p value</b> | <b>r</b> |
|---------------------|------------------------------------------------------------------------------|-----------|------------|----------|---------------------|----------------|----------|
| MSPSS<br>(baseline) | 5.37                                                                         | 1.18      | 1.10       | -0.86*** | [-1.34, -<br>0.37]  | p<.0001        | -.31**   |
| PCL-6<br>(baseline) | 17.38                                                                        | 5.07      | 1.10       | 0.45***  | [0.34, -<br>0.56]   | p<.0001        | .46**    |
| Treatment<br>dosage | 7.00                                                                         | 2.14      | 1.00       | -0.05    | [-0.30, -<br>0.21]  | 0.73           | -.03     |
| Perinatal<br>Period | N/A (items<br>were coded<br>1 or 2<br>based on<br>pregnant or<br>postpartum) | N/A       | 1.00       | -1.14*   | [-2.23, -<br>0.04]  | 0.04           | -.10     |

**R<sup>2</sup>= .258\*\***  
**95% CI [.17, .33]**

Note: \* indicates p <.05. \*\* indicates p <.01. \*\*\* indicates p <.001
